# Supplementary material
Source: publisher figshare collection journal article supplement (https://tandf.figshare.com/articles/dataset/_/17373024)

Supplemental figure 1A: Overall survival in patients with pancreatic ductal adenocarcinoma who underwent immediate resection of the primary tumor (<50 years vs. 50-59 years) (n=282)

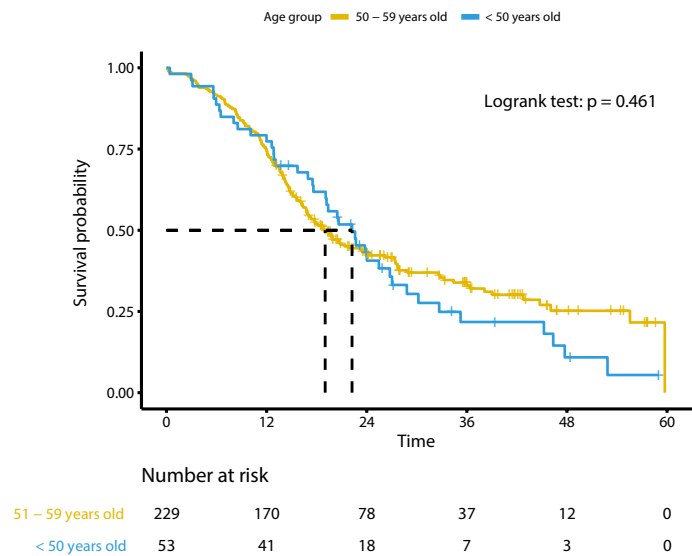

Supplemental figure 1B: Overall survival of patients with pancreatic ductal adenocarcinoma who received chemotherapy, without resection (<50 years vs. 50-59 years) (n=663)

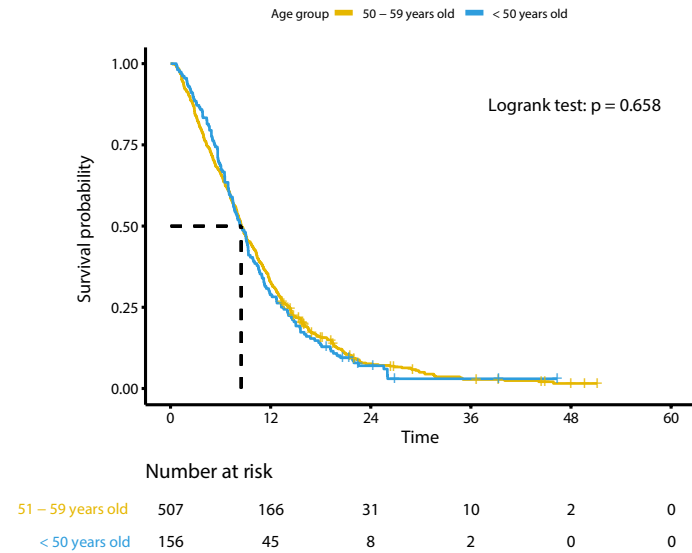

Supplemental figure 1C: Overall survival of patients with pancreatic ductal adenocarcinoma who received no anticancer treatment (<50 years vs. 50-59 years) (n=519)

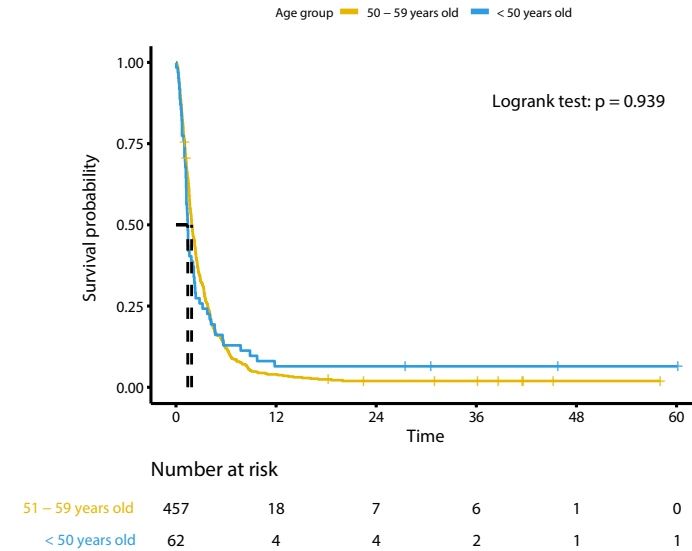

Supplement: Supplementary file 1 [file 1]
